# Supplementary material
Source: HighWire-hosted journal article supplement (https://svn.smart01.highwire.org/content/3/4/237)
Supplement: inline-supplementary-material-1 [file inline-supplementary-material-1.pdf]

## Supplemental material Table1 . Water Swallow Tests Procedure

### 【Procedure】

The patient is asked to sit in the bed, and is handed a paper cup containing 30 mL of water at normal temperature. The patient is then asked to “Please drink this water as you usually do.” Time to empty a cup is measured, drinking profile and episodes are monitored and assessed.

|           | Drinking Profile                                                               |
|-----------|--------------------------------------------------------------------------------|
| Level I   | The patient can drink all the water in 1 gulp without choking.                 |
| Level II  | The patient can drink all the water in 2 or more gulps without choking.        |
| Level III | The patient can drink all the water in 1 gulp, but with some choking.          |
| Level IV  | The patient can drink all the water in 2 or more gulps, but with some choking. |
| Level V   | The patient often chokes and has difficulty drinking all the water.            |

### 【Drinking episodes】

Sipping, holding water in the mouth while drinking, water coming out of the mouth, a tendency to try to force himself/herself to continue drinking despite choking, drinking water in a cautious manner, etc.

### 【Diagnosis】

Normal: Completed Profile Level I within 5sec

Suspected: Completed Profile Level I in more than 5sec, or Profile Level II Abnormal : Any cases of Profiles Level III through Level V

## Supplemental material Table2.

### Baseline Characteristics of Patients with Acute Ischemic Stroke Who had WST and V-VST

|                                                                 | WST<br>n=230      |                  |                |        | V-VST<br>n=230               |                            |        | P <sup>§</sup> |
|-----------------------------------------------------------------|-------------------|------------------|----------------|--------|------------------------------|----------------------------|--------|----------------|
|                                                                 | Negative<br>n=164 | Positive<br>n=60 | Unclear<br>n=6 | P      | Safety and efficacy<br>n=180 | Impaired function*<br>n=50 | P      |                |
| Age ,years old, Mean+SD                                         | 61.90±13.35       | 65.83±11.90      | 70.00±16.65    | 0.038  | 61.97±13.20                  | 67.34±12.33                | 0.011  | 0.626          |
| Gender ,males ,%                                                | 116(70.73)        | 42(70.0)         | 3(50.0)        | 0.553  | 129(71.67)                   | 32(64.0)                   | 0.295  | 0.637          |
| Onset to admission ,days,<br>Mean+SD                            | 3.34±3.20         | 2.87±3.09        | 2.67±2.16      | 0.229  | 3.38±3.01                    | 2.52±2.38                  | 0.041  | 0.526          |
| Length of stay(LOS), days,<br>Mean+SD                           | 8.63±3.57         | 12.40±9.24       | 20.80±12.40    | <0.001 | 8.72±3.53                    | 14.32±10.86                | 0.001  | 0.549          |
| Length of stay in the ICU, days                                 | 0.64±1.41         | 2.23±4.06        | 3.00±3.46      | 0.030  | 0.77±2.00                    | 2.36±3.69                  | <0.001 | 0.929          |
| NIHSS                                                           | 3.65±3.25         | 8.90±5.96        | 12.83±5.04     | <0.001 | 3.99±3.65                    | 9.82±6.06                  | <0.001 | 0.618          |
| <b>Baseline Characteristics</b>                                 |                   |                  |                |        |                              |                            |        |                |
| Systolic blood pressure(SBP),<br>mmHg, Median+Interquatile<br>) | 151(130-169)      | 151(136-165)     | 153(124-170)   | 0.769  | 150(130-168)                 | 154(138-165)               | 0.744  | 0.836          |
| Diastolic blood press(DBP),<br>mmhg, Median+Interquatile        | 82(74-92)         | 83(75-96)        | 85(76-98)      | 0.692  | 83(74-92)                    | 82(74-92)                  | 0.618  | 0.795          |
| <b>Stroke Aetiology (TOAST):</b>                                |                   |                  |                | 0.001  |                              |                            | <0.001 | 0.913          |
| Large Artery (n, %)                                             | 81 (49.40)        | 29(48.33)        | 4(66.67)       |        | 90(50.0)                     | 24(48.0)                   |        |                |
| Cardioembolic (n, %)                                            | 7 (4.27)          | 13(21.67)        | 2(33.34)       |        | 9(5.0)                       | 13(26.0)                   |        |                |
| Small vessel occlusion (n, %)                                   | 44 (26.83)        | 9(15.0)          | /              |        | 47(26.11)                    | 6(12.0)                    |        |                |
| Underterminated or Other etiology<br>(n, %)                     | 32 (19.51)        | 9(15.0)          | /              |        | 34(18.89)                    | 7(14.0)                    |        |                |
| <b>Risk factors</b>                                             |                   |                  |                |        |                              |                            |        |                |
| Atrial fibrillation(AF) (n, %)                                  | 4(2.44)           | 10(16.67)        | 2(33.34)       | <0.001 | 6(3.33)                      | 7(14.0)                    | 0.004  | 0.955          |
| Diabetes Mellitus (n, %)                                        | 46(28.05)         | 21(35.0)         | 2(33.34)       | 0.594  | 50(27.78)                    | 19(38.0)                   | 0.163  | 0.727          |
| Hypertension (n, %)                                             | 119(72.56)        | 7(11.67)         | 4(66.67)       | 0.768  | 131(72.78)                   | 38(76.0)                   | 0.648  | 0.976          |
| Smoking (n, %)                                                  | 87(53.05)         | 27(45.0)         | 3(50.0)        | 0.565  | 97(53.89)                    | 24(48.0)                   | 0.646  | 0.785          |

**TOAST:** Trial of Org 10 172 in acute stroke treatment

\* Impaired function in VVST stands for that patients have functional impaired in safety or/and efficacy or patients failed to cooperate the test.

§ The difference between the patients failed water test and the patients failed Volume-Viscosity Test
